# Supplementary material for: Prenatal Lead Exposure Is Associated with Reduced Abundance of Beneficial Gut Microbial Cliques in Late Childhood: An Investigation Using Microbial Co-Occurrence Analysis (MiCA)
Source: PubMed Central journal article supplement — Environ Sci Technol. 2023 Oct 25;57(44):16800–10. doi: 10.1021/acs.est.3c04346 (PMC10634322; doi:10.1021/acs.est.3c04346), 2023-10-25
Supplement: es3c04346_si_001.pdf [file es3c04346_si_001.pdf]

# ***Supplementary Materials***

## **Prenatal lead exposure is associated with reduced abundance of beneficial gut microbial cliques in late childhood: an investigation using Microbial Co-occurrence Analysis (MiCA)**

Vishal Midya<sup>1</sup>, Jamil M. Lane<sup>1</sup>, Chris Gennings<sup>1</sup>, Libni A. Torres-Olascoaga<sup>2</sup>, Jill K. Gregory<sup>3</sup>, Robert O. Wright<sup>1</sup>, Manish Arora<sup>1</sup>, Martha Maria Téllez-Rojo<sup>2</sup>, Shoshannah Eggers<sup>1,4</sup>

1. Department of Environmental Medicine and Public Health, Icahn School of Medicine at Mount Sinai, New York, New York 10029, USA.
2. Center for Research on Nutrition and Health, National Institute of Public Health, Cuernavaca 62100, Mexico.
3. Instructional Technology Group, Icahn School of Medicine at Mount Sinai, New York, New York 10029, USA.
4. Department of Epidemiology, University of Iowa College of Public Health, Iowa City, Iowa 52242, USA.

**Number of Pages: 18**

**Number of Figures: 3**

**Number of Tables: 7**

**This Supporting Information includes the following:**

1. **Supplementary Table 1:** MiCA for Pb exposure at 2T
  - 1.1. Supplementary Table 1a: Train on Batch 2 and Test on Batch 1
  - 1.2. Supplementary Table 1b: Train on 60% and Test on remaining 40%
  - 1.3. Supplementary Table 1c: Repeated Hold-out SiRF (with 60% for training and 40% for testing) repeated over 300 times
2. **Supplementary Table 2:** MiCA for Pb exposure at 3T
  - 2.1. Supplementary Table 2a: Train on Batch 2 and Test on Batch 1
  - 2.2. Supplementary Table 2b: Train on 60% and Test on remaining 40%
  - 2.3. Supplementary Table 2c: Repeated Hold-out SiRF (with 60% for training and 40% for testing) repeated over 300 times
3. **Supplementary Table 3:** Gene Pathways
4. **Supplementary Table 4:** Odds Ratio and 95% CIs from association analysis without any covariate balancing or matching
5. **Supplementary Table 5:** Association estimates after repeating the analysis without imputing any missing covariate data
6. **Supplementary Table 6:** Association estimates after cutoff thresholds being set at the 25<sup>th</sup> or 40<sup>th</sup> percentile relative abundance
  - 6.1. Supplementary Table 6a: cutoff thresholds being set at the 40<sup>th</sup> percentile
  - 6.2. Supplementary Table 6b: cutoff thresholds being set at the 25<sup>th</sup> percentile
7. **Supplementary Table 7:** Association estimates after adjusting for child Pb exposure at 12 and 24 months
8. **Supplementary Figure 1:** Distribution of propensity scores after covariate balancing
9. **Supplementary Figure 2:** Love plot of covariate balancing after subclass matching
10. **Supplementary Figure 3:** Exploratory analysis of 2T Pb concentration

## Supplementary Table 1: MiCA for Pb exposure at second trimester (2T)

### Supplementary Table 1a

#### Train on Batch 2 and Test on Batch 1

| Cliques                    | Prevalence   | Precision    | Stability    | Exposure co-occurrence frequency |
|----------------------------|--------------|--------------|--------------|----------------------------------|
| Taxa.2+_Taxa.20-           | 0.113        | 0.617        | 0.988        | 2/4                              |
| Taxa.131-_Taxa.2+          | 0.147        | 0.580        | 1.000        | 6/2                              |
| <b>Taxa.20-_Taxa.216-</b>  | <b>0.112</b> | <b>0.533</b> | <b>0.956</b> | <b>4/2</b>                       |
| <b>Taxa.131-_Taxa.216-</b> | <b>0.138</b> | <b>0.530</b> | <b>0.988</b> | <b>6/2</b>                       |
| <b>Taxa.131-_Taxa.20-</b>  | <b>0.334</b> | <b>0.529</b> | <b>1.000</b> | <b>6/4</b>                       |
| Taxa.20-_Taxa.43-          | 0.160        | 0.496        | 0.992        | 4/2                              |
| Taxa.131-_Taxa.43-         | 0.193        | 0.501        | 0.992        | 6/2                              |

Presenting only those cliques with a stability of more than 0.75 and a prevalence of more than 0.1. See the scientific name of all the Taxa in the Supplementary file "Taxa.names"

### Supplementary Table 1b

#### Train on 60% and Test on remaining 40%

| Cliques                    | Prevalence   | Precision    | Stability    | Exposure co-occurrence frequency |
|----------------------------|--------------|--------------|--------------|----------------------------------|
| Taxa.131-_Taxa.22-         | 0.102        | 0.520        | 0.880        | 6/2                              |
| Taxa.20-_Taxa.22-          | 0.111        | 0.516        | 0.964        | 5/2                              |
| Taxa.216-_Taxa.43-         | 0.109        | 0.484        | 0.772        | 3/3                              |
| <b>Taxa.131-_Taxa.216-</b> | <b>0.206</b> | <b>0.485</b> | <b>1.000</b> | <b>6/3</b>                       |
| Taxa.20-_Taxa.22+          | 0.128        | 0.474        | 0.756        | 5/2                              |
| <b>Taxa.20-_Taxa.216-</b>  | <b>0.226</b> | <b>0.482</b> | <b>1.000</b> | <b>5/3</b>                       |
| Taxa.131-_Taxa.22+         | 0.142        | 0.471        | 0.792        | 6/2                              |
| Taxa.131-_Taxa.43-         | 0.202        | 0.469        | 0.988        | 6/3                              |
| Taxa.20-_Taxa.43-          | 0.221        | 0.466        | 1.000        | 5/3                              |
| <b>Taxa.131-_Taxa.20-</b>  | <b>0.342</b> | <b>0.476</b> | <b>1.000</b> | <b>6/5</b>                       |

Presenting only those cliques with a stability of more than 0.75 and a prevalence of more than 0.1. See the scientific name of all the Taxa in the Supplementary file "Taxa.names"

### Supplementary Table 1c

Repeated Hold-out SiRF (with 60% for training and 40% for testing)  
repeated over 300 times

| Cliques                    | Frequency of occurrence (in %) |
|----------------------------|--------------------------------|
| Taxa.131-_Taxa.5-          | 7.9                            |
| Taxa.5-_Taxa.94-           | 4.9                            |
| Taxa.5-_Taxa.61-           | 3.9                            |
| Taxa.131-_Taxa.42-         | 3.6                            |
| Taxa.131-_Taxa.61-         | 3.6                            |
| Taxa.131-_Taxa.94-         | 3.6                            |
| Taxa.1-_Taxa.131-          | 3                              |
| Taxa.1-_Taxa.5-            | 3                              |
| Taxa.30-_Taxa.5-           | 3                              |
| Taxa.131-_Taxa.2-          | 2.6                            |
| <b>Taxa.131-_Taxa.216-</b> | <b>2.6</b>                     |
| <b>Taxa.131-_Taxa.20-</b>  | <b>2.3</b>                     |
| Taxa.131-_Taxa.76-         | 2.3                            |
| Taxa.2-_Taxa.5-            | 2.3                            |
| Taxa.42-_Taxa.5-           | 2.3                            |
| Taxa.131-_Taxa.30-         | 2                              |
| Taxa.34-_Taxa.5-           | 2                              |
| Taxa.42-_Taxa.94-          | 2                              |
| Taxa.5-_Taxa.76-           | 2                              |
| Taxa.1-_Taxa.216-          | 1.6                            |
| Taxa.20-_Taxa.5-           | 1.6                            |
| Taxa.21-_Taxa.5-           | 1.6                            |
| Taxa.34-_Taxa.94-          | 1.6                            |
| Taxa.76-_Taxa.94-          | 1.6                            |
| Taxa.1-_Taxa.20-           | 1.3                            |
| Taxa.131-_Taxa.21-         | 1.3                            |
| Taxa.21-_Taxa.94-          | 1.3                            |
| Taxa.61-_Taxa.94-          | 1.3                            |
| Taxa.1-_Taxa.30-           | 1                              |
| Taxa.1-_Taxa.34-           | 1                              |
| Taxa.2-_Taxa.61-           | 1                              |
| <b>Taxa.20-_Taxa.216-</b>  | <b>1</b>                       |
| Taxa.21-_Taxa.42-          | 1                              |
| Taxa.216-_Taxa.5-          | 1                              |
| Taxa.30-_Taxa.94-          | 1                              |

|                    |     |
|--------------------|-----|
| Taxa.42-_Taxa.76-  | 1   |
| Taxa.1-_Taxa.42-   | 0.7 |
| Taxa.1-_Taxa.61-   | 0.7 |
| Taxa.1-_Taxa.76-   | 0.7 |
| Taxa.131-_Taxa.2+  | 0.7 |
| Taxa.131-_Taxa.52- | 0.7 |
| Taxa.2-_Taxa.20-   | 0.7 |
| Taxa.2-_Taxa.216-  | 0.7 |
| Taxa.20-_Taxa.61-  | 0.7 |
| Taxa.21-_Taxa.30-  | 0.7 |
| Taxa.21-_Taxa.61-  | 0.7 |
| Taxa.216-_Taxa.42- | 0.7 |
| Taxa.34-_Taxa.42-  | 0.7 |
| Taxa.5-_Taxa.52-   | 0.7 |
| Taxa.1-_Taxa.22-   | 0.3 |
| Taxa.1-_Taxa.52-   | 0.3 |
| Taxa.1-_Taxa.94-   | 0.3 |
| Taxa.120-_Taxa.61- | 0.3 |
| Taxa.120-_Taxa.94- | 0.3 |
| Taxa.131-_Taxa.16- | 0.3 |
| Taxa.131-_Taxa.22- | 0.3 |
| Taxa.131-_Taxa.26- | 0.3 |
| Taxa.131-_Taxa.28- | 0.3 |
| Taxa.131-_Taxa.3-  | 0.3 |
| Taxa.131-_Taxa.7-  | 0.3 |
| Taxa.131-_Taxa.8+  | 0.3 |
| Taxa.16-_Taxa.42-  | 0.3 |
| Taxa.16-_Taxa.5-   | 0.3 |
| Taxa.16-_Taxa.61-  | 0.3 |
| Taxa.2-_Taxa.42-   | 0.3 |
| Taxa.2-_Taxa.52-   | 0.3 |
| Taxa.2+_Taxa.42-   | 0.3 |
| Taxa.2+_Taxa.61-   | 0.3 |
| Taxa.20-_Taxa.34-  | 0.3 |
| Taxa.21-_Taxa.76-  | 0.3 |
| Taxa.216-_Taxa.30- | 0.3 |
| Taxa.216-_Taxa.61- | 0.3 |
| Taxa.26-_Taxa.61-  | 0.3 |
| Taxa.28-_Taxa.5-   | 0.3 |
| Taxa.3-_Taxa.5-    | 0.3 |
| Taxa.30-_Taxa.34-  | 0.3 |

|                    |     |
|--------------------|-----|
| Taxa.30- _Taxa.61- | 0.3 |
| Taxa.42- _Taxa.43- | 0.3 |
| Taxa.42- _Taxa.61- | 0.3 |
| Taxa.43- _Taxa.5-  | 0.3 |
| Taxa.5- _Taxa.7-   | 0.3 |
| Taxa.5- _Taxa.8+   | 0.3 |
| Taxa.52- _Taxa.94- | 0.3 |
| Taxa.61- _Taxa.8+  | 0.3 |

**Note:**

- 1) See the scientific name of all the Taxa in the file “**taxa.names.csv**” posted in <https://github.com/vishalmidya/MiCA-Microbial-Co-occurrence-Analysis>
- 2) The *red fonted*, **bolded**, and *italicized* cliques denote the choice of the final three-way cliques. Those cliques, namely, *Taxa.20- \_Taxa.216-*, *Taxa.131- \_Taxa.216-*, and *Taxa.20- \_Taxa.131* are (a) common between Supplementary Table 1a **and** Supplementary Table 1b, **and** their Frequency of occurrences are above the 1% threshold cutoff (Supplementary Table 1c).

## Supplementary Table 2: MiCA for Pb exposure at 3T

### Supplementary Table 2a

#### Train on Batch 2 and Test on Batch 1

No clique was found with stability of more than 0.75 and a prevalence of more than 0.1

### Supplementary Table 2b

#### Train on 60% and Test on remaining 40%

| Cliques           | Prevalence | Precision | Stability | Exposure co-occurrence frequency |
|-------------------|------------|-----------|-----------|----------------------------------|
| Taxa.21- Taxa.5-  | 0.191      | 0.575     | 1.000     | 3/3                              |
| Taxa.21- Taxa.22- | 0.125      | 0.561     | 0.988     | 3/3                              |
| Taxa.5- Taxa.61-  | 0.195      | 0.523     | 1.000     | 3/3                              |
| Taxa.21- Taxa.61- | 0.171      | 0.525     | 1.000     | 3/3                              |
| Taxa.22- Taxa.5-  | 0.179      | 0.502     | 1.000     | 3/3                              |
| Taxa.22- Taxa.61- | 0.154      | 0.479     | 0.996     | 3/3                              |

Presenting only those cliques with a stability of more than 0.75 and a prevalence of more than 0.1. See the scientific name of all the Taxa in the Supplementary file "Taxa.names"

### Supplementary Table 2c

#### Repeated Hold-out SiRF (with 60% for training and 40% for testing) repeated over 300 times

| Cliques            | Frequency of occurrence (in %) |
|--------------------|--------------------------------|
| Taxa.22- Taxa.61-  | 13                             |
| Taxa.21- Taxa.61-  | 8                              |
| Taxa.21- Taxa.22-  | 7                              |
| Taxa.5- Taxa.61-   | 6                              |
| Taxa.111- Taxa.61- | 5                              |
| Taxa.111- Taxa.22- | 4                              |
| Taxa.21- Taxa.5-   | 4                              |
| Taxa.22- Taxa.5-   | 4                              |
| Taxa.2+ Taxa.61-   | 2                              |
| Taxa.20- Taxa.22-  | 2                              |

|                    |   |
|--------------------|---|
| Taxa.20-_Taxa.61-  | 2 |
| Taxa.22-_Taxa.31-  | 2 |
| Taxa.111-_Taxa.21- | 2 |
| Taxa.2+_Taxa.22-   | 2 |
| Taxa.22-_Taxa.30-  | 2 |
| Taxa.42-_Taxa.61-  | 2 |
| Taxa.111-_Taxa.5-  | 1 |
| Taxa.20-_Taxa.30-  | 1 |
| Taxa.30-_Taxa.5-   | 1 |
| Taxa.30-_Taxa.61-  | 1 |
| Taxa.31-_Taxa.61-  | 1 |
| Taxa.61-_Taxa.94-  | 1 |
| Taxa.111-_Taxa.42- | 1 |
| Taxa.111-_Taxa.49- | 1 |
| Taxa.111-_Taxa.6-  | 1 |
| Taxa.131-_Taxa.20- | 1 |
| Taxa.131-_Taxa.22- | 1 |
| Taxa.131-_Taxa.30- | 1 |
| Taxa.131-_Taxa.5-  | 1 |
| Taxa.131-_Taxa.9+  | 1 |
| Taxa.131-_Taxa.94- | 1 |
| Taxa.16-_Taxa.31-  | 1 |
| Taxa.16-_Taxa.61-  | 1 |
| Taxa.2+_Taxa.20-   | 1 |
| Taxa.2+_Taxa.5-    | 1 |
| Taxa.2+_Taxa.94-   | 1 |
| Taxa.20-_Taxa.21-  | 1 |
| Taxa.20-_Taxa.43-  | 1 |
| Taxa.20-_Taxa.8+   | 1 |
| Taxa.20-_Taxa.94-  | 1 |
| Taxa.21-_Taxa.31-  | 1 |
| Taxa.21-_Taxa.48-  | 1 |
| Taxa.21-_Taxa.49-  | 1 |
| Taxa.21-_Taxa.6-   | 1 |
| Taxa.21+_Taxa.22-  | 1 |
| Taxa.21+_Taxa.31-  | 1 |
| Taxa.22-_Taxa.42-  | 1 |
| Taxa.22-_Taxa.43-  | 1 |
| Taxa.22-_Taxa.48-  | 1 |
| Taxa.22-_Taxa.7-   | 1 |
| Taxa.22-_Taxa.9+   | 1 |



|                   |   |
|-------------------|---|
| Taxa.22+_Taxa.31- | 1 |
| Taxa.22+_Taxa.61- | 1 |
| Taxa.3-_Taxa.42-  | 1 |
| Taxa.3-_Taxa.5-   | 1 |
| Taxa.3-_Taxa.61-  | 1 |
| Taxa.3-_Taxa.94-  | 1 |
| Taxa.30-_Taxa.94- | 1 |
| Taxa.31-_Taxa.5-  | 1 |
| Taxa.42-_Taxa.5-  | 1 |
| Taxa.42-_Taxa.94- | 1 |
| Taxa.49-_Taxa.5-  | 1 |
| Taxa.49-_Taxa.61- | 1 |
| Taxa.5-_Taxa.6-   | 1 |
| Taxa.61-_Taxa.7-  | 1 |
| Taxa.61-_Taxa.8+  | 1 |

See the scientific name of all the Taxa in the Supplementary file "Taxa.names"

### Supplementary Table 3: Gene Pathways

| Taxon                                      | Gene Pathway                                                                                                                                                                                                                                                                                                                                                                                                                                                                                                                                                                                                                                                                                                                                                                                                                                                                                                                                                                                                                                                                                                             |
|--------------------------------------------|--------------------------------------------------------------------------------------------------------------------------------------------------------------------------------------------------------------------------------------------------------------------------------------------------------------------------------------------------------------------------------------------------------------------------------------------------------------------------------------------------------------------------------------------------------------------------------------------------------------------------------------------------------------------------------------------------------------------------------------------------------------------------------------------------------------------------------------------------------------------------------------------------------------------------------------------------------------------------------------------------------------------------------------------------------------------------------------------------------------------------|
| <p><b>Bifidobacterium adolescentis</b></p> | <p>COA-PWY-1: coenzyme A biosynthesis II (mammalian)<br/>           HISTSYN-PWY: L-histidine biosynthesis<br/>           NONMEVIPP-PWY: methylerythritol phosphate pathway I<br/>           PEPTIDOGLYCANSYN-PWY: peptidoglycan biosynthesis I (meso-diaminopimelate containing)<br/>           PWY-6122: 5-aminoimidazole ribonucleotide biosynthesis II<br/>           PWY-6151: S-adenosyl-L-methionine cycle I<br/>           PWY-6277: superpathway of 5-aminoimidazole ribonucleotide biosynthesis<br/>           PWY-6386: UDP-N-acetylmuramoyl-pentapeptide biosynthesis II (lysine-containing)<br/>           PWY-6387: UDP-N-acetylmuramoyl-pentapeptide biosynthesis I (meso-diaminopimelate containing)<br/>           PWY-7219: adenosine ribonucleotides de novo biosynthesis<br/>           PWY-7221: guanosine ribonucleotides de novo biosynthesis<br/>           THRESYN-PWY: superpathway of L-threonine biosynthesis<br/>           UDPNAGSYN-PWY: UDP-N-acetyl-D-glucosamine biosynthesis I<br/>           VALSYN-PWY: L-valine biosynthesis</p>                                                    |
| <p><b>Paraprevotella clara</b></p>         | <p>COA-PWY-1: coenzyme A biosynthesis II (mammalian)<br/>           NONMEVIPP-PWY: methylerythritol phosphate pathway I<br/>           PANTO-PWY: phosphopantothenate biosynthesis I<br/>           PEPTIDOGLYCANSYN-PWY: peptidoglycan biosynthesis I (meso-diaminopimelate containing)<br/>           PWY-2942: L-lysine biosynthesis III<br/>           PWY-5097: L-lysine biosynthesis VI<br/>           PWY-5667: CDP-diacylglycerol biosynthesis I<br/>           PWY-6151: S-adenosyl-L-methionine cycle I<br/>           PWY-6386: UDP-N-acetylmuramoyl-pentapeptide biosynthesis II (lysine-containing)<br/>           PWY-6387: UDP-N-acetylmuramoyl-pentapeptide biosynthesis I (meso-diaminopimelate containing)<br/>           PWY-6700: queuosine biosynthesis<br/>           PWY-7111: pyruvate fermentation to isobutanol (engineered)<br/>           PWY-7219: adenosine ribonucleotides de novo biosynthesis<br/>           PWY-7221: guanosine ribonucleotides de novo biosynthesis<br/>           PWY0-1319: CDP-diacylglycerol biosynthesis II<br/>           VALSYN-PWY: L-valine biosynthesis</p> |

|                                  |                                                                                                                                                                                                                                                                                                                                                                                                                                                                                                                                                                                                                                                                                                           |
|----------------------------------|-----------------------------------------------------------------------------------------------------------------------------------------------------------------------------------------------------------------------------------------------------------------------------------------------------------------------------------------------------------------------------------------------------------------------------------------------------------------------------------------------------------------------------------------------------------------------------------------------------------------------------------------------------------------------------------------------------------|
| <b>Ruminococcus<br/>callidus</b> | COA-PWY-1: coenzyme A biosynthesis II (mammalian)<br>PANTO-PWY: phosphopantothenate biosynthesis I<br>PWY-5097: L-lysine biosynthesis VI<br>PWY-5188: tetrapyrrole biosynthesis I (from glutamate)<br>PWY-6121: 5-aminoimidazole ribonucleotide biosynthesis I<br>PWY-6122: 5-aminoimidazole ribonucleotide biosynthesis II<br>PWY-6151: S-adenosyl-L-methionine cycle I<br>PWY-6163: chorismate biosynthesis from 3-dehydroquinate<br>PWY-6277: superpathway of 5-aminoimidazole ribonucleotide biosynthesis<br>PWY-6700: queuosine biosynthesis<br>PWY-6703: preQ0 biosynthesis<br>PWY-7219: adenosine ribonucleotides de novo biosynthesis<br>PWY-7221: guanosine ribonucleotides de novo biosynthesis |
|----------------------------------|-----------------------------------------------------------------------------------------------------------------------------------------------------------------------------------------------------------------------------------------------------------------------------------------------------------------------------------------------------------------------------------------------------------------------------------------------------------------------------------------------------------------------------------------------------------------------------------------------------------------------------------------------------------------------------------------------------------|

**Supplementary Table 4: Odds Ratio and 95% CIs from association analysis without any covariate balancing or matching**

| <b>Outcome</b>                                                 | <b>Odds Ratio</b> | <b>95% CI</b> | <b>p-value</b> |
|----------------------------------------------------------------|-------------------|---------------|----------------|
| Below-median relative abundance of the 2-taxa microbial clique | 1.02              | (1.00, 1.04)  | 0.03           |
| Below-median relative abundance of the 3-taxa microbial clique | 1.01              | (0.99, 1.03)  | 0.17           |

**Supplementary Table 5: Association estimates after repeating the analysis without imputing any missing covariate data**

| <b>Outcome</b>                                                 | <b>Odds Ratio</b> | <b>95% CI</b> | <b>p-value</b> |
|----------------------------------------------------------------|-------------------|---------------|----------------|
| Below-median relative abundance of the 2-taxa microbial clique | 1.02              | (1.00, 1.04)  | 0.04           |
| Below-median relative abundance of the 3-taxa microbial clique | 1.01              | (0.99, 1.03)  | 0.28           |

## Supplementary Table 6: Association estimates after cutoff thresholds being set at the 25<sup>th</sup> or 40<sup>th</sup> percentile relative abundance

### Supplementary Table 6a: Cutoff thresholds being set at the 40<sup>th</sup> percentile

| <b>Outcome</b>                                                 | <b>Odds Ratio</b> | <b>95% CI</b> | <b>p-value</b> |
|----------------------------------------------------------------|-------------------|---------------|----------------|
| Below-median relative abundance of the 2-taxa microbial clique | 1.02              | (1.00, 1.04)  | 0.11           |
| Below-median relative abundance of the 3-taxa microbial clique | 1.01              | (0.99, 1.03)  | 0.34           |

### Supplementary Table 6b: Cutoff thresholds being set at the 25<sup>th</sup> percentile

| <b>Outcome</b>                                                 | <b>Odds Ratio</b> | <b>95% CI</b> | <b>p-value</b> |
|----------------------------------------------------------------|-------------------|---------------|----------------|
| Below-median relative abundance of the 2-taxa microbial clique | 1.01              | (0.99, 1.04)  | 0.26           |
| Below-median relative abundance of the 3-taxa microbial clique | 1.00              | (0.98, 1.04)  | 0.63           |

**Supplementary Table 7: Association estimates after adjusting for child Pb exposure at 12 and 24 months**

| <b>Outcome</b>                                                 | <b>Odds Ratio</b> | <b>95% CI</b> | <b>p-value</b> |
|----------------------------------------------------------------|-------------------|---------------|----------------|
| Below-median relative abundance of the 2-taxa microbial clique | 1.02              | (1.00, 1.04)  | 0.04           |
| Below-median relative abundance of the 3-taxa microbial clique | 1.01              | (0.99, 1.04)  | 0.18           |

## Supplementary Figure 1: Distribution of propensity scores after covariate balancing

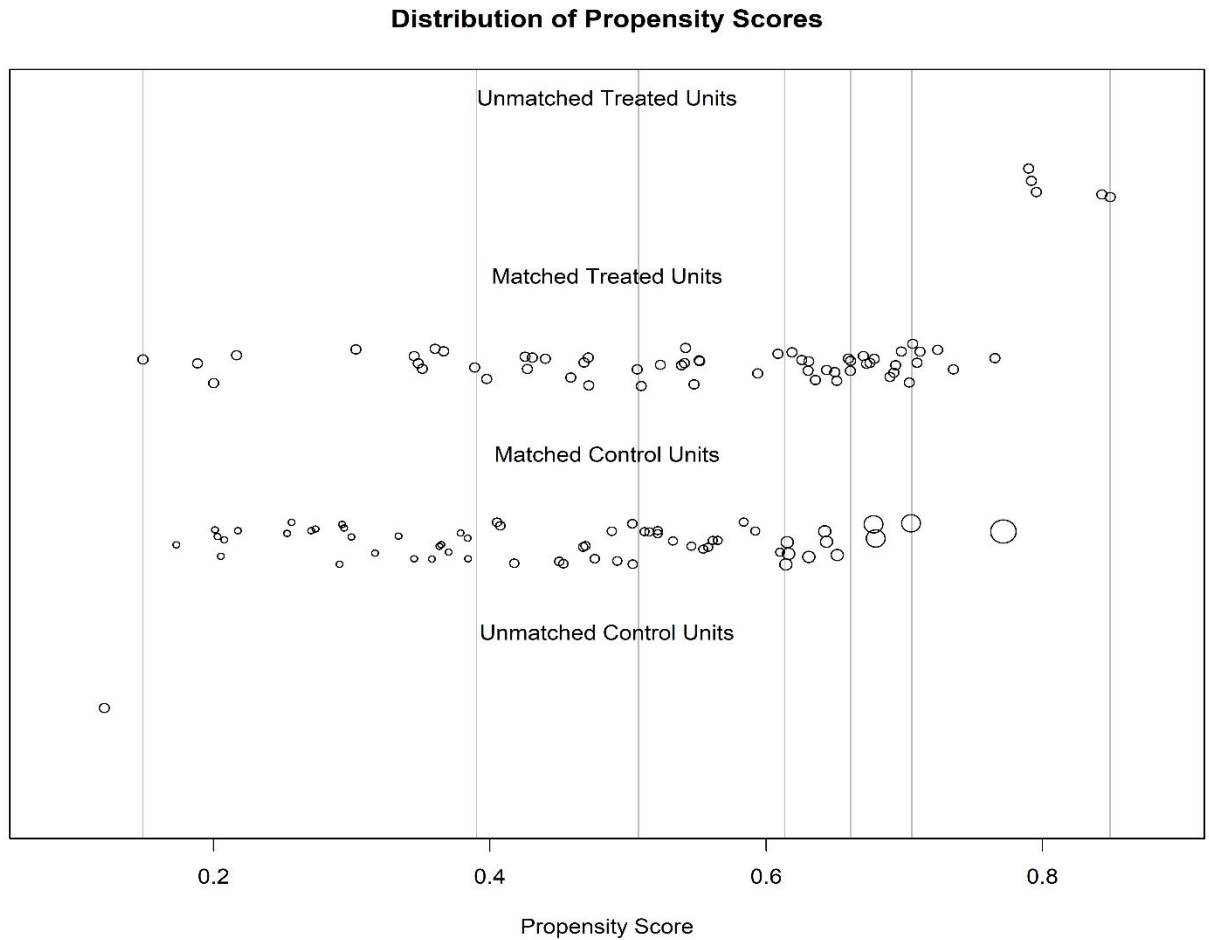

The covariate balancing using propensity score was conducted based on high (above median) vs. low (below median) second-trimester Pb exposure. The “control units” refer to the low-exposure group, whereas the “treated units” refer to the high-exposure group.



## Supplementary Figure 2: Love plot of covariate balancing after subclass matching

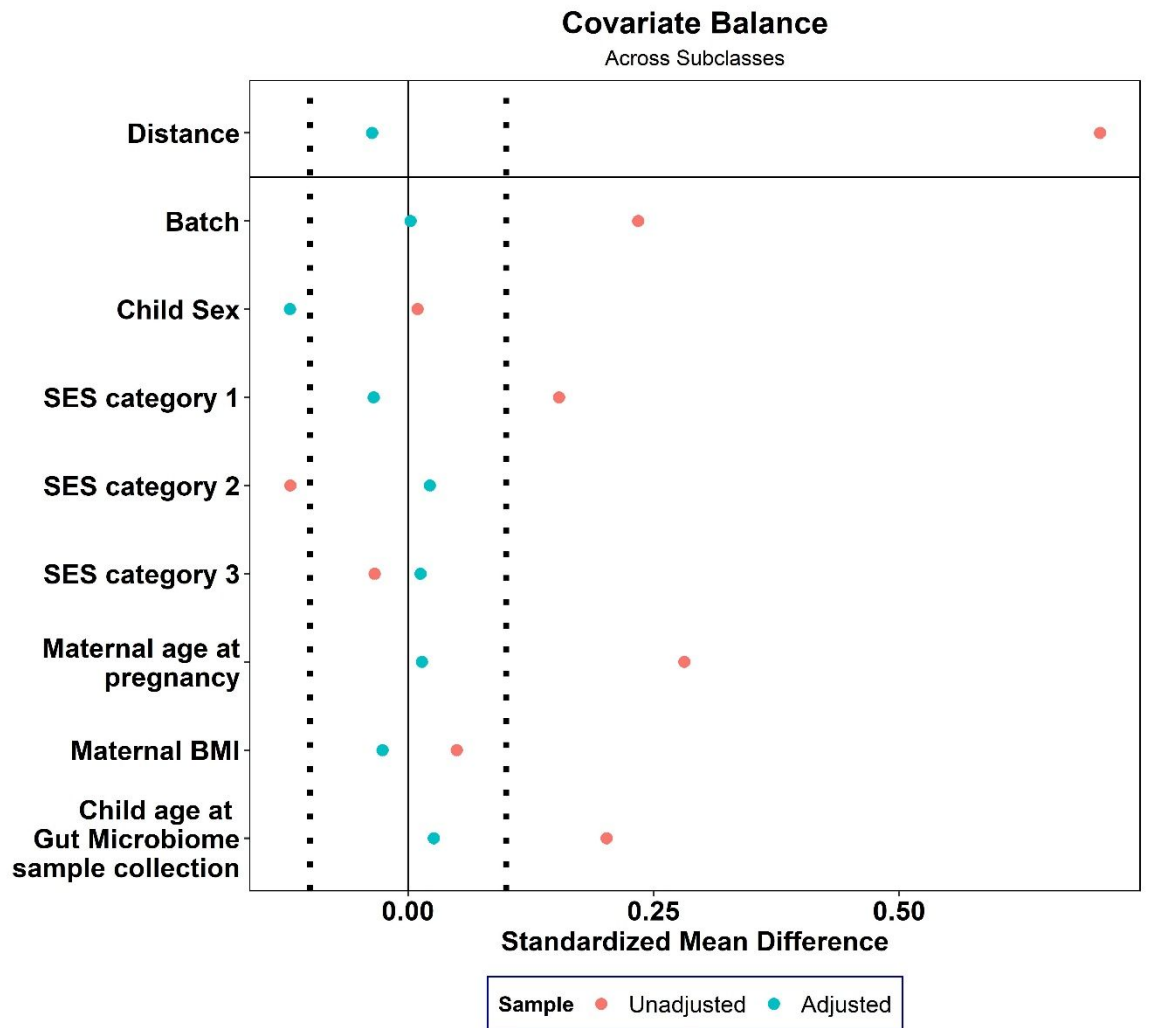

Love plot showing standardized mean differences between before vs. after covariate balancing. The dotted vertical lines show the standardized mean difference between -0.1 to 0.1, which is set as a threshold. If the standardized mean difference lies within these bounds after adjustment, the corresponding covariate will be adjusted as “matched” or “balanced” between the high vs. low exposure group.

## Supplementary Figure 3: Exploratory analysis of Second trimester Pb concentration

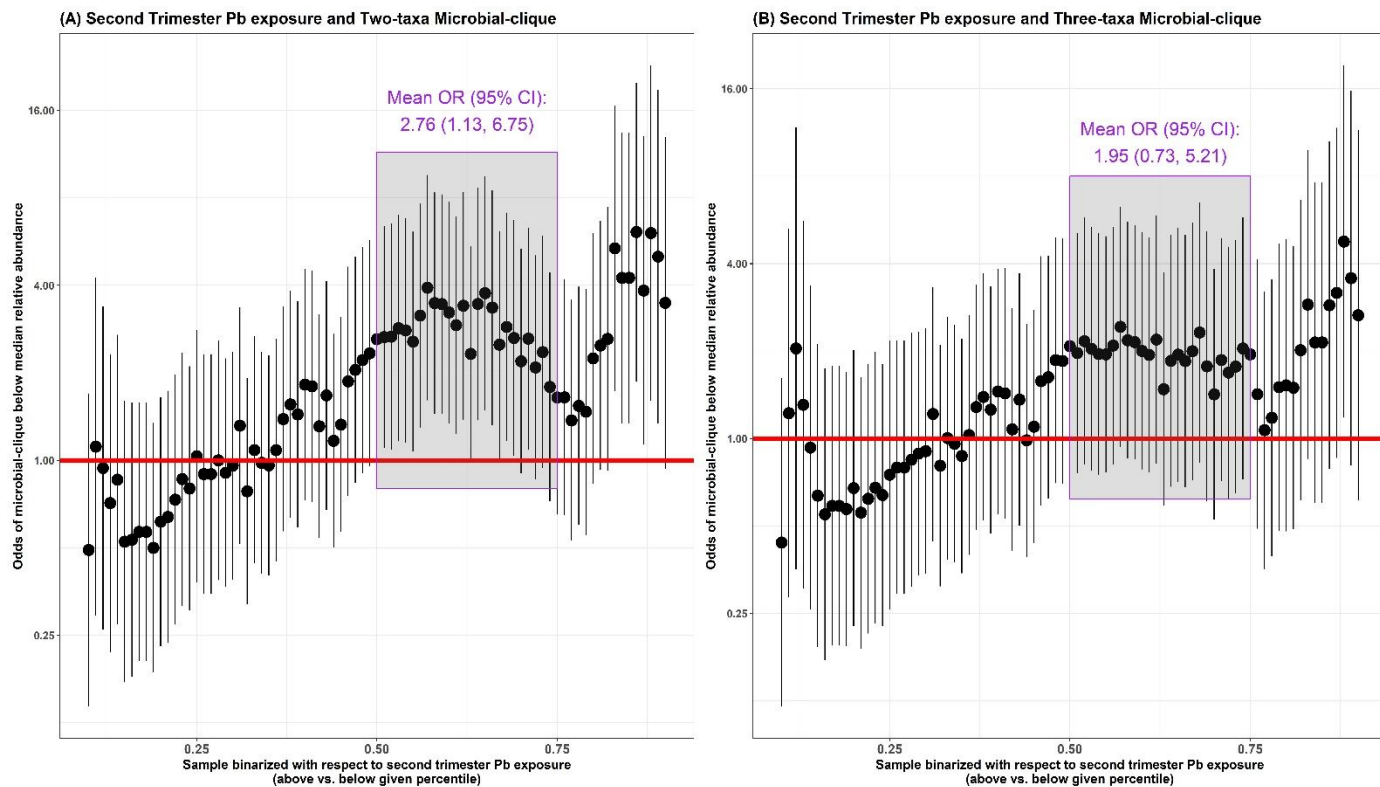

Odds of having below-median relative abundance of the (A) 2- and (B) 3-taxa cliques with respect to sample that was binarized using increasing quantiled 2T Pb concentration
